# Supplementary material
Source: MDPI journal article supplement (https://www.mdpi.com/1996-1073/14/14/4250)
Supplement: s1 [file s1]

## Article

# Lactic Acid-Based Solvents for Sustainable EDLC Electrolytes

Massimo Melchiorre <sup>1</sup>, Roberto Esposito <sup>2</sup>, Martino Di Serio <sup>2</sup>, Giancarlo Abbate <sup>1</sup>, Alessandro Lampasi <sup>3</sup>, Andrea Balducci <sup>4</sup> and Francesco Ruffo <sup>2,\*</sup>

<sup>1</sup> CapTop S.r.l.; 80023, Italy; massimo.melchiorre@captop.it (M. M.), abbate@captop.it (G. A.);

<sup>2</sup> Department of Chemical Science, University of Naples Federico II; Naples 80138, Italy; roberto.esposito@unina.it (R. E.), diserio@unina.it (M. D. S.);

<sup>3</sup> National Agency for New Technologies, Energy and Sustainable Economic Development (ENEA), Frascati 00044, Italy; alessandro.lampasi@enea.it

<sup>4</sup> Institute of Technical Chemistry and Environmental Chemistry, Center for Energy and Environmental Chemistry (CEEC Jena), Friedrich Schiller University Jena, Jena, 07743, Germany; andrea.balducci@uni-jena.de

\* Correspondence: ruffo@unina.it

## Supplementary Materials

**Citation:** Melchiorre, M.; Esposito, R.; Di Serio, M.; Abbate, G.; Lampasi, A.; Balducci, A.; Ruffo, F. Lactic acid-based solvents for sustainable EDLC electrolytes. *Energies* **2021**, *14*, 4250. <https://doi.org/10.3390/en14144250>

Academic Editor(s): Haolin Tang

Received: 22 June 2021

Accepted: 11 July 2021

Published: 14 July 2021

**Publisher's Note:** MDPI stays neutral with regard to jurisdictional claims in published maps and institutional affiliations.

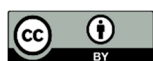

**Copyright:** © 2021 by the authors. Licensee MDPI, Basel, Switzerland. This article is an open access article distributed under the terms and conditions of the Creative Commons Attribution (CC BY) license (<http://creativecommons.org/licenses/by/4.0/>).

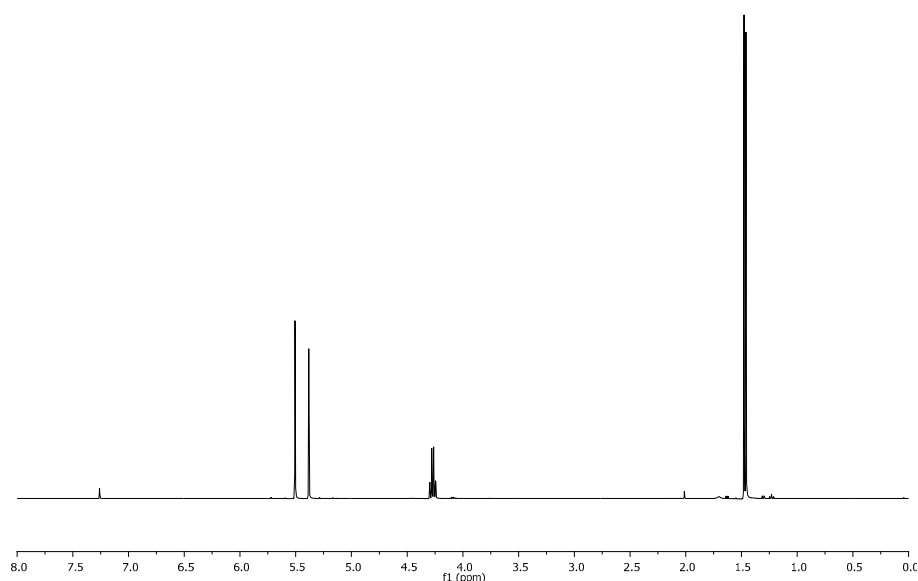

**Figure S1.** 5-methyl-1,3-dioxolan-4-one (LA-H,H) characterization. <sup>1</sup>H NMR (400 MHz, CDCl<sub>3</sub>) δ 5.51 (s, 1H), 5.38 (s, 1H), 4.27 (q, *J* = 6.8, 1H), 1.47 (d, *J* = 6.8, 3H).

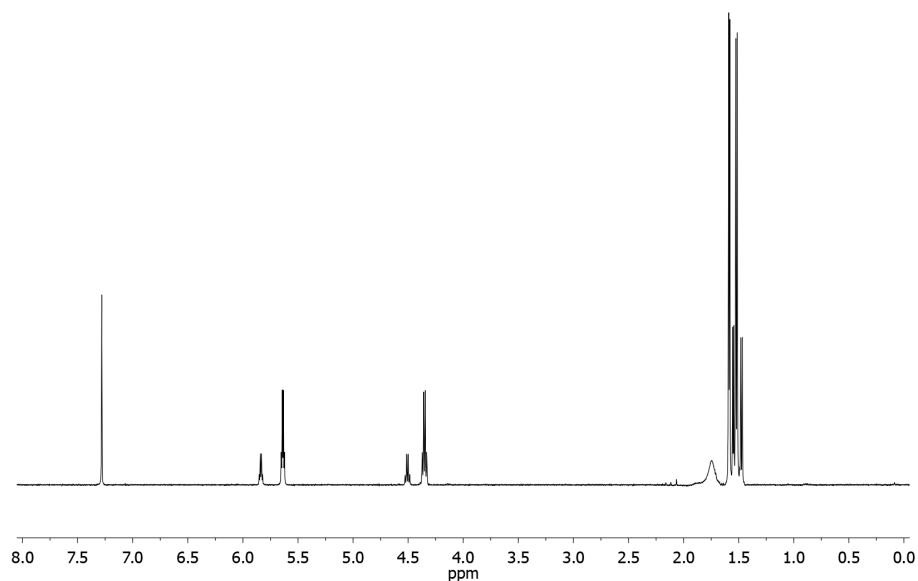

**Figure S2.** 5,2-dimethyl-1,3-dioxolan-4-one (LA-H,Me) characterization. Major stereoisomer:  $^1\text{H}$  NMR (400 MHz,  $\text{CDCl}_3$ )  $\delta$  5.64 (q, 1H,  $J = 5.0$  Hz), 4.35 (q, 1H,  $J = 7.0$  Hz), 1.59 (d, 3H,  $J = 5.0$  Hz), 1.52 (d, 3H,  $J = 7.0$  Hz). Minor stereoisomer:  $^1\text{H}$  NMR (400 MHz,  $\text{CDCl}_3$ )  $\delta$  5.84 (q, 1H,  $J = 5.0$  Hz), 4.50 (q, 1H,  $J = 7.0$  Hz), 1.55 (d, 3H,  $J = 5.0$  Hz), 1.48 (d, 3H,  $J = 7.0$  Hz).

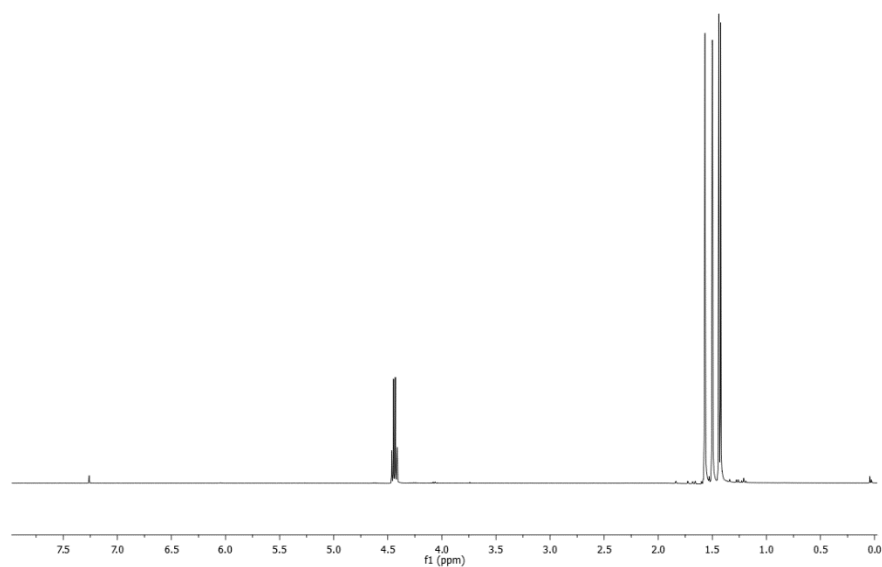

**Figure S3.** 5,2,3-trimethyl-1,3-dioxolan-4-one (LA-Me,Me) characterization.  $^1\text{H}$  NMR (400 MHz,  $\text{CDCl}_3$ )  $\delta$  4.46 (q,  $J = 6.8$  Hz, 1H), 1.59 (s, 3H), 1.52 (s, 3H), 1.46 (d,  $J = 6.8$  Hz, 3H).

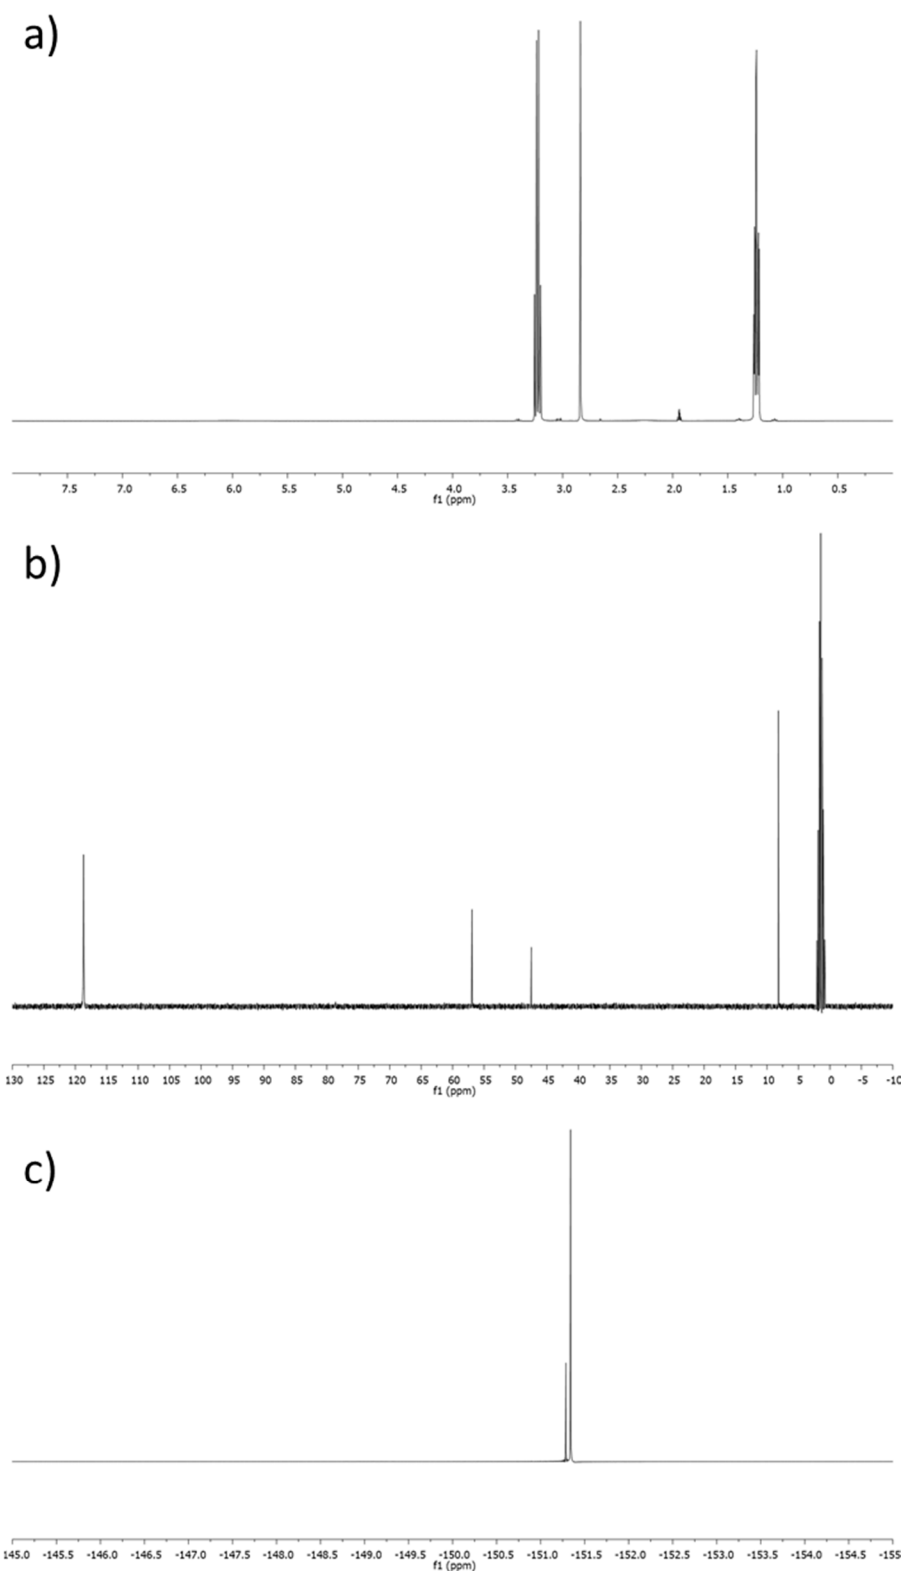

**Figure S4.** Triethylmethylammonium tetrafluoroborate (TEMABF<sub>4</sub>) characterization. (a) <sup>1</sup>H NMR (400 MHz, CD<sub>3</sub>CN) δ 3.23 (q, *J* = 7.3 Hz, 6H), 2.84 (s, 3H), 1.30 – 1.18 (t, *J*<sub>N</sub> = 2 Hz, 9H). (b) <sup>13</sup>C NMR (101 MHz, CD<sub>3</sub>CN) δ 56.91 (t, *J*<sub>N</sub> = 3 Hz), 47.48 (t, *J*<sub>N</sub> = 4 Hz), 8.19. (c) <sup>19</sup>F NMR (376 MHz, CD<sub>3</sub>CN) δ -151.29 (<sup>10</sup>B), -151.34 (<sup>11</sup>B).

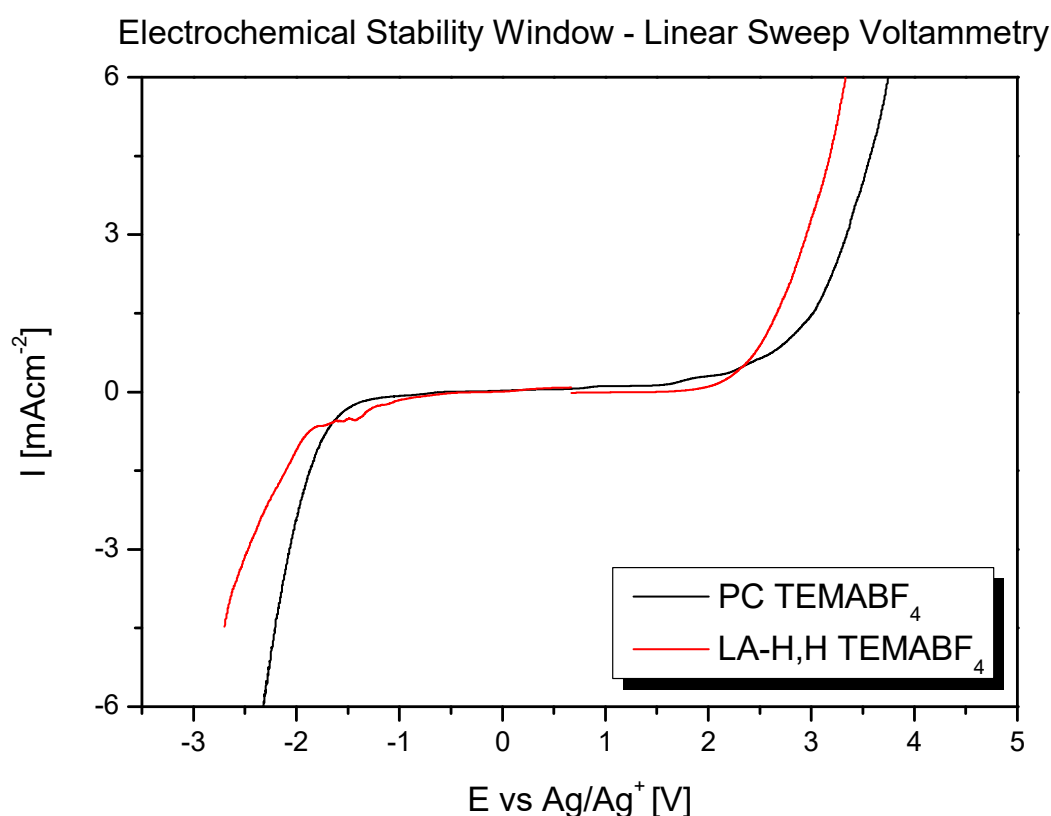

**Figure S5.** Electrochemical stability window analysis.

**Table S1.** ESW data at different current densities cut-off.

| Electrolyte | 0.5 mAcm <sup>-2</sup> |                     |      | 1.0 mAcm <sup>-2</sup> |                     |      | 1.5 mAcm <sup>-2</sup> |                     |      |
|-------------|------------------------|---------------------|------|------------------------|---------------------|------|------------------------|---------------------|------|
|             | E <sub>rid</sub> (V)   | E <sub>ox</sub> (V) | ΔV   | E <sub>rid</sub> (V)   | E <sub>ox</sub> (V) | ΔV   | E <sub>rid</sub> (V)   | E <sub>ox</sub> (V) | ΔV   |
| PC          | -1.60                  | 2.35                | 3.95 | -1.75                  | 2.80                | 4.55 | -1.85                  | 3.00                | 4.85 |
| LA-H,H      | -1.50                  | 2.35                | 3.85 | -1.95                  | 2.55                | 4.50 | -2.10                  | 2.70                | 4.80 |

**Table S2.** Relevant performance from cited literature.

| Entry [Ref] | Electrode                                  | Electrolyte                                                          | Operative Voltage | Specific Energy*                                   | Specific Power*                                   | Stability                                   |
|-------------|--------------------------------------------|----------------------------------------------------------------------|-------------------|----------------------------------------------------|---------------------------------------------------|---------------------------------------------|
| [1]         | Active Carbon EDLC asymmetric              | Non-aqueous CPAME <sup>d</sup> [Py <sub>14</sub> ][BF <sub>4</sub> ] | 3.0 V             | Not reported                                       | Not reported                                      | Float test 500 h at 3.0V<br>Cap Ret 52.5%   |
| [2]         | Active Carbon EDLC                         | Organic CPAME [Et <sub>4</sub> N][BF <sub>4</sub> ]                  | 3.5 V             | Not reported                                       | Not reported                                      | Float test 500 h at 3.2V<br>Cap Ret 78%     |
| [3]         | Active Carbon EDLC Monolithic              | WiS LiTFSI 5 M                                                       | 2.4 V             | 24 Whkg <sup>-1</sup><br>10 Whkg <sup>-1</sup>     | 0.48 kWkg <sup>-1</sup><br>7.6 kWkg <sup>-1</sup> | 10,000 at 5 Ag <sup>-1</sup><br>Cap Ret 81% |
| [4]         | 3D-CMF-EDA <sup>a</sup> Pseudocapacitor or | WiS NaTFSI 8.1 m                                                     | 2.2 V             | 48.5 Whkg <sup>-1</sup>                            | 4.9 kWkg <sup>-1</sup>                            | 3000 at 5Ag <sup>-1</sup><br>Cap Ret 90%    |
| [5]         | PD CNRs <sup>b</sup> EDLC                  | WiS LiTFSI 21 m                                                      | 2.2 V             | 29.6 Whkg <sup>-1</sup><br>21.5 Whkg <sup>-1</sup> | 1.1 kWkg <sup>-1</sup><br>10.9 kWkg <sup>-1</sup> | 6000 at 5Ag <sup>-1</sup><br>Cap Ret 99%    |

|     |                                    |                                      |       |                                                    |                                                   |                                                  |
|-----|------------------------------------|--------------------------------------|-------|----------------------------------------------------|---------------------------------------------------|--------------------------------------------------|
| [6] | Active Carbon<br>EDLC<br>Coin cell | WiS<br>NaClO <sub>4</sub> 17 m       | 2.3 V | 23.7 Whkg <sup>-1</sup><br>16.7 Whkg <sup>-1</sup> | 1.1 kWkg <sup>-1</sup><br>20.7 kWkg <sup>-1</sup> | 20,000 at 5Ag <sup>-1</sup><br>Cap Ret 85%       |
| [7] | AC<br>EDLC                         | Microemulsion <sup>c</sup>           | 2.7 V | Not reported                                       | 1.35 kWkg <sup>-1</sup><br>5.4 kWkg <sup>-1</sup> | 10,000 at<br>0.5Ag <sup>-1</sup><br>Cap Ret 99%  |
| [8] | AC EDLC<br>asymmetric              | WiS<br>NH <sub>4</sub> OAc 26.4<br>m | 1.2 V | 9.2 Whkg <sup>-1</sup>                             | 0.45 kWkg <sup>-1</sup>                           | 1000 at 1.0<br>Ag <sup>-1</sup><br>Cap Ret < 95% |

<sup>a</sup>3D-CMF-EtOH: 3-dimensional-carbonized melamine foam-ethylendiammine as liquid component; <sup>b</sup>Polyaniline derived carbon nanoroads, <sup>c</sup>microemulsion 84% wt distilled water, 4% wt sodium dodecyl sulfate, 9% wt n-butanol, 3%wt ciclohexane; \*data report at low and high current densities.

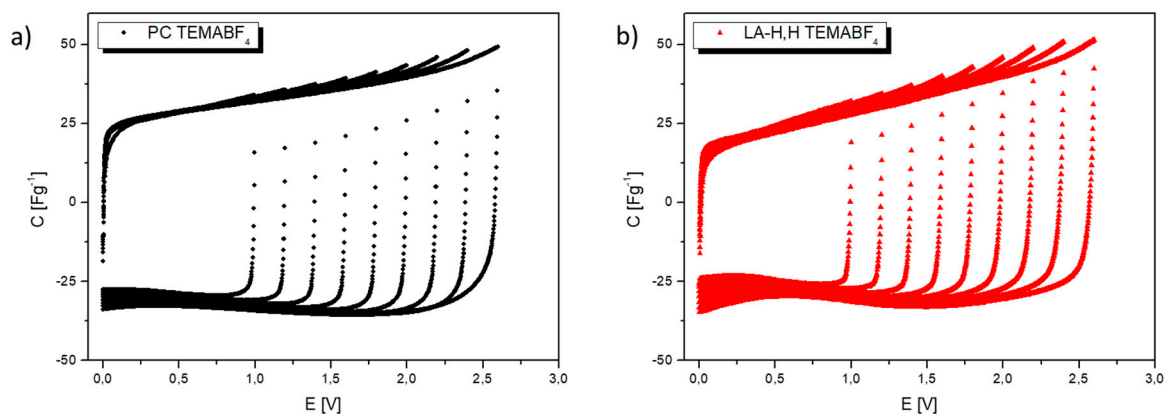

**Figure S6.** Operative voltage investigation.

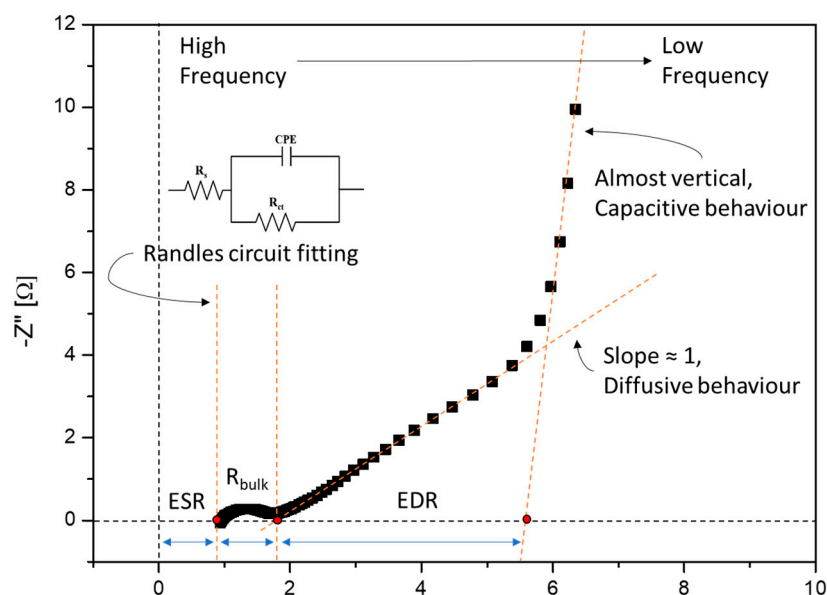

Figure S7. Nyquist plot analysis and resistances evaluations.

## References

- Schütter, C.; Passerini, S.; Korth, M.; Balducci, A. Cyano Ester as Solvent for High Voltage Electrochemical Double Layer Capacitors. *Electrochim. Acta* **2017**, *224*, 278–284.
- Schütter, C.; Husch, T.; Viswanathan, V.; Passerini, S.; Balducci, A.; Korth, M. Rational design of new electrolyte materials for electrochemical double layer capacitors. *J. Power Sources* **2016**, *326*, 541–548.
- Hasegawa, G.; Kanamori, K.; Kiyomura, T.; Kurata, H.; Abe, T.; Nakanishi, K. Hierarchically Porous Carbon Monoliths Comprising Ordered Mesoporous Nanorod Assemblies for High-Voltage Aqueous Supercapacitors. *Chem. Mater.* **2016**, *28*, 3944–3950.
- Xu, S.-W.; Zhang, M.-C.; Zhang, G.-Q.; Liu, J.-H.; Liu, X.-Z.; Zhang, X.; Zhao, D.-D.; Xu, C.-L.; Zhao, Y.-Q. Temperature-dependent performance of carbon-based supercapacitors with water-in-salt electrolyte. *J. Power Sources* **2019**, *441*, 227220.
- Xiao, D.; Wu, Q.; Liu, X.; Dou, Q.; Liu, L.; Yang, B.; Yu, H. Aqueous Symmetric Supercapacitors with Carbon Nanorod Electrodes and Water-in-Salt Electrolyte. *ChemElectroChem* **2019**, *6*, 439–443.
- Bu, X.; Su, L.; Dou, Q.; Lei, S.; Yan, X. A low-cost “water-in-salt” electrolyte for a 2.3 V high-rate carbon-based supercapacitor. *J. Mater. Chem. A* **2019**, *7*, 7541–7547.
- Hughson, F. R.; Borah, R.; Nann, T. A 2.7 V Aqueous Supercapacitor Using a Microemulsion Electrolyte\*\*. *Batter. Supercaps* **2021**.
- El Halimi, M. S.; Poli, F.; Mancuso, N.; Olivieri, A.; Mattioli, E. J.; Calvaresi, M.; Chafik, T.; Zanelli, A.; Soavi, F. Circumneutral concentrated ammonium acetate solution as water-in-salt electrolyte. *Electrochim. Acta* **2021**, *389*, 138653.
